# Supplementary material for: Lysoptosis is an evolutionarily conserved cell death pathway moderated by intracellular serpins
Source: PubMed Central journal article supplement (PMC8755814; doi:10.1038/s42003-021-02953-x), 2022-01-12
Supplement: 42003_2021_2953_MOESM3_ESM.pdf [file 42003_2021_2953_MOESM3_ESM.pdf]

## Description of Additional Supplementary Files

**File name:** Supplementary Movie 1

**Description:** Live-cell, confocal microscopy assessed lysosomal content (red, 10K TMR-labeled dextran) and plasma membrane permeability (green) in mSerp1nb3a<sup>+/+</sup> FIECs treated with 100% DPBS.

**File name:** Supplementary Movie 2

**Description:** Live-cell, confocal microscopy assessed lysosomal content (red, 10K TMR-labeled dextran) and plasma membrane permeability (green) in mSerp1nb3a<sup>-/-</sup> FIECs treated with 100% DPBS.

**File name:** Supplementary Movie 3

**Description:** Live-cell, confocal microscopy assessed lysosomal content (red, 10K TMR-labeled dextran) and plasma membrane permeability (green) in mSerp1nb3a<sup>+/+</sup> FIECs treated with 25% DPBS.

**File name:** Supplementary Movie 4

**Description:** Live-cell, confocal microscopy assessed lysosomal content (red, 10K TMR-labeled dextran) and plasma membrane permeability (green) in mSerp1nb3a<sup>-/-</sup> FIECs treated with 25% DPBS.
